# Supplementary material for: Novel dithiols as capping ligands for CdSe quantum dots: optical properties and solar cell applications
Source: Royal Society of Chemistry journal article supplement (doi:10.1039/c4tc01863j), 2014-12-19
Supplement: c4tc01863j1.pdf [file c4tc01863j1.pdf]

# Novel Dithiols as Capping Ligands for CdSe Quantum Dots: Optical Properties and Solar Cell Applications

Avvaru Praveen Kumar,<sup>†</sup> Bui The Huy,<sup>†,‡</sup> Begari Prem Kumar,<sup>†</sup> Jong Hwa Kim,<sup>†</sup> Dao Van Duong,<sup>§</sup> Ho-Suk Choi,<sup>§</sup> and Yong-Ill Lee<sup>†\*</sup>

<sup>†</sup>Department of Chemistry, Changwon National University, Changwon 641-773, Korea.

<sup>‡</sup>Nhatrang Institute of Technology Research and Application, Vietnam Academy of Science and Technology (VAST), 2 Hung Vuong, Nhatrang, Vietnam.

<sup>§</sup>Department of Chemical Engineering, Chungnam National University, Daejeon, Korea.

## Supporting Information

**Scheme S1.** Synthesis of dithiols.

**Figure S2.** FT-IR spectra of DT-capped CdSe QDs.

**Figure S3.** TGA curves of CdSe and DT-capped CdSe QDs.

**Figure S4.** The temporal evolution time of the absorption spectra of DT-capped CdSe QDs.

**Figure S5.** Comparison of PL intensities of CdSe and DT-capped CdSe QDs.

**Figure S6.** Photocurrent density-voltage curves of QD solar cells containing DT-capped CdSe.

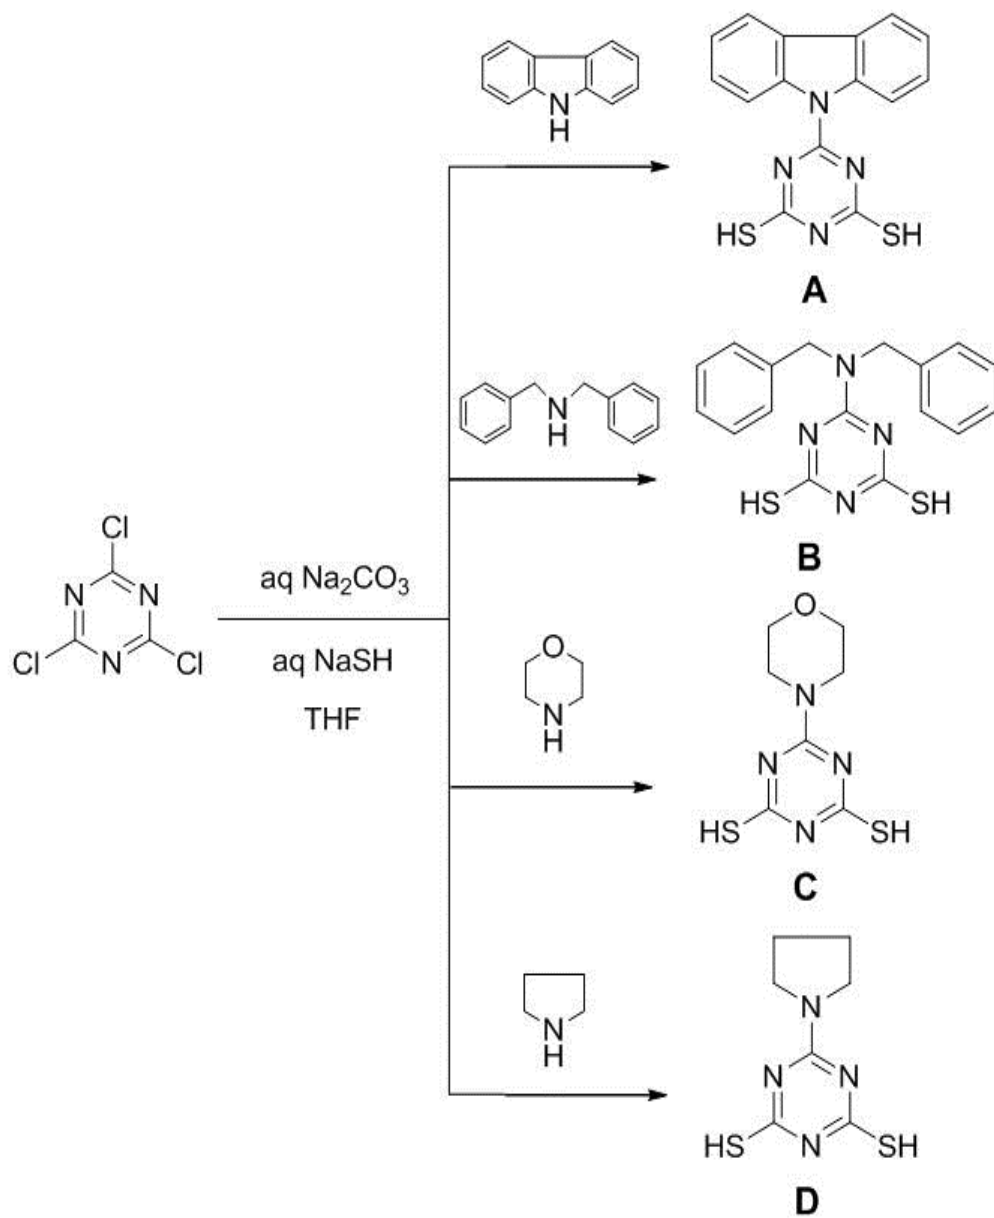

**Scheme S1.** Synthesis of dithiols.

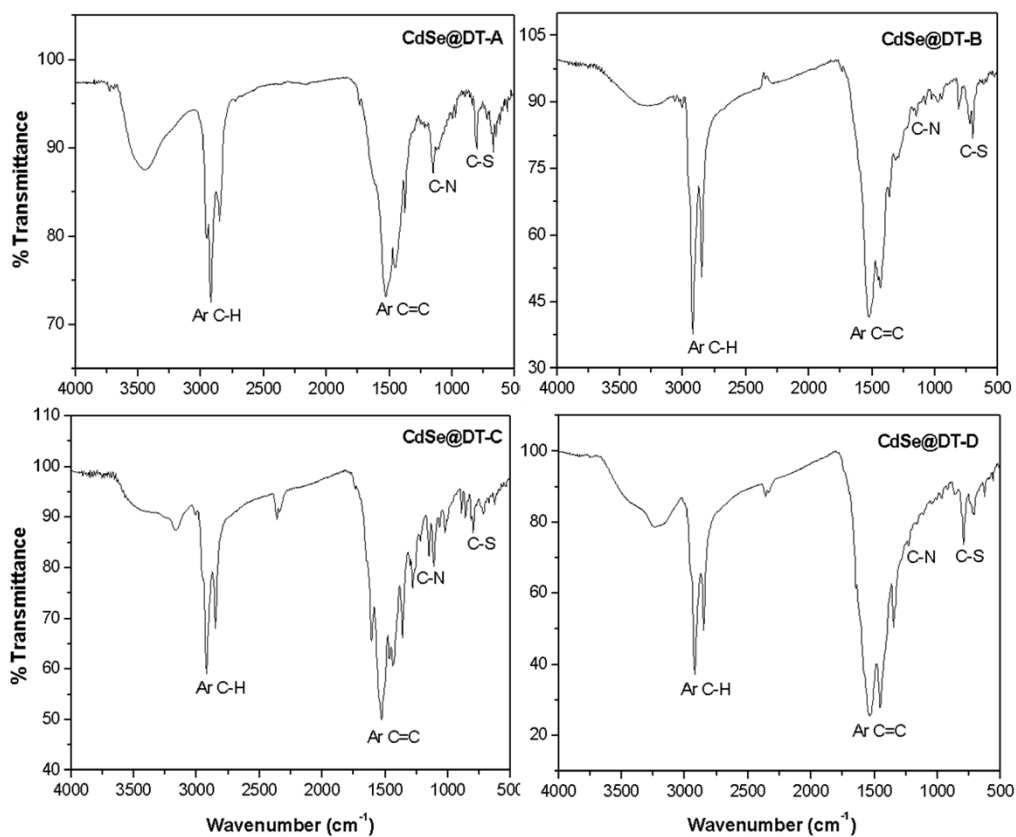

**Figure S2.** FT-IR spectra of DT-capped CdSe QDs.

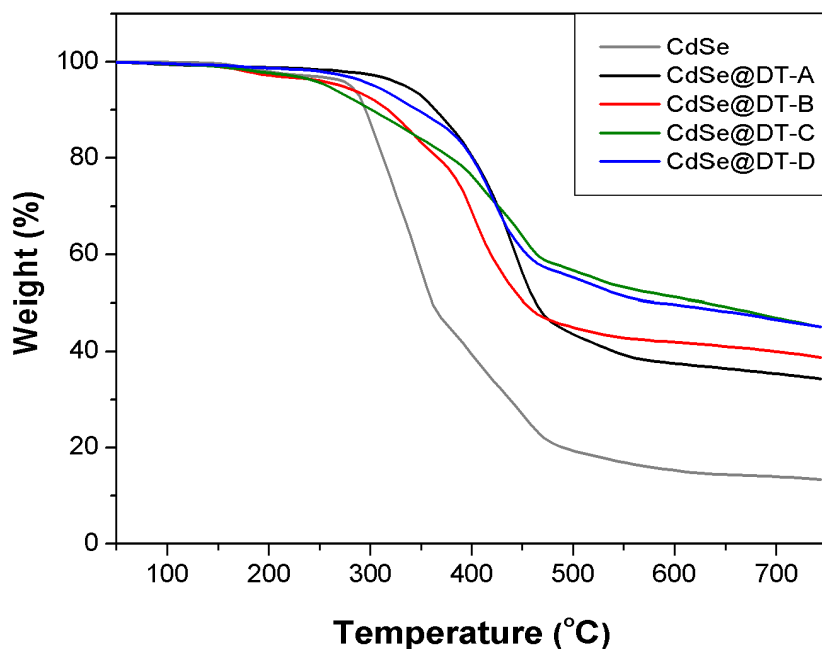

**Figure S3.** TGA curves of CdSe and DT-capped CdSe QDs.

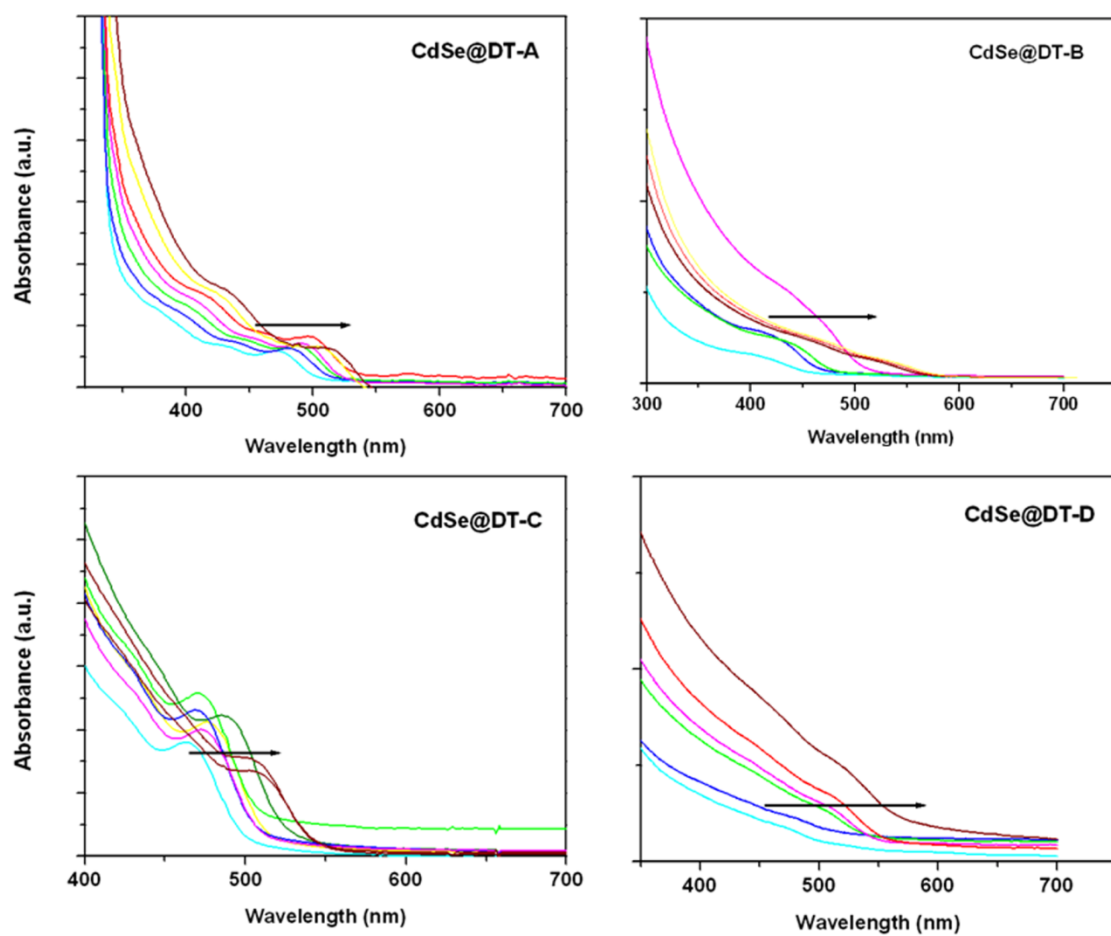

**Figure S4.** The temporal evolution time of the absorption spectra of DT-capped CdSe QDs.

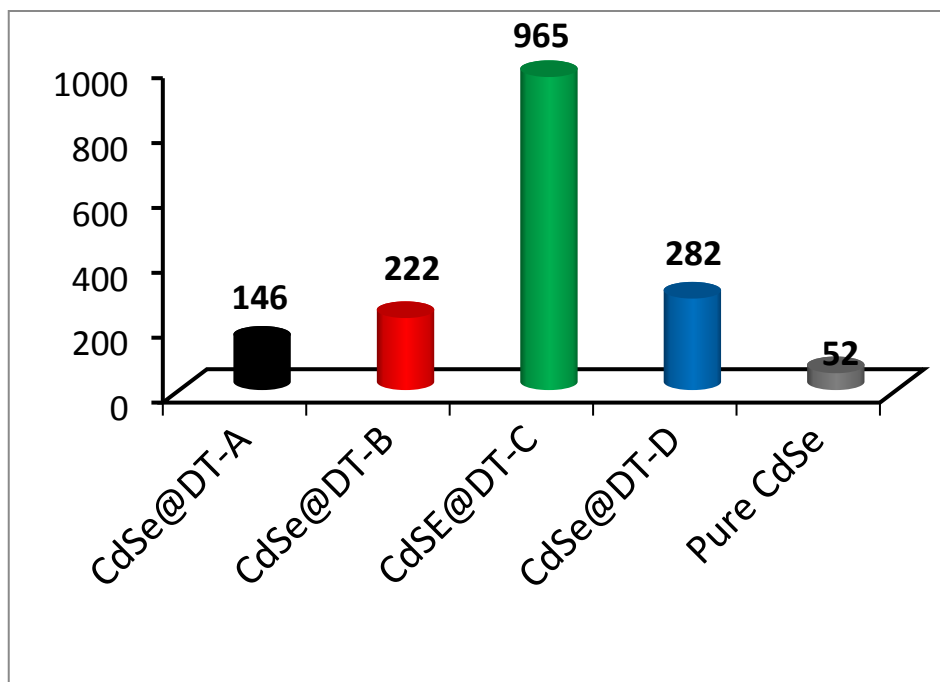

**Figure S5.** Comparison of PL intensities of CdSe and DT-capped CdSe QDs.

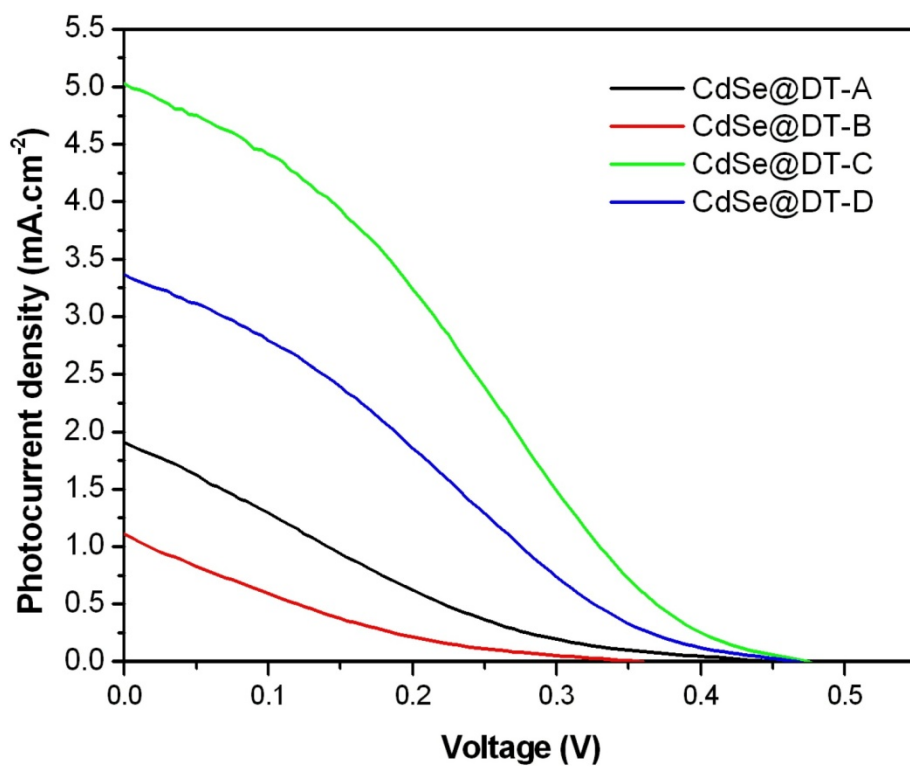

**Figure S6.** Photocurrent density-voltage curves of QD solar cells containing DT-capped CdSe.
